# Supplementary material
Source: publisher figshare collection journal article supplement (https://frontiersin.figshare.com/ndownloader/files/16846874)
Supplement: Supplementary file [file 16846874]

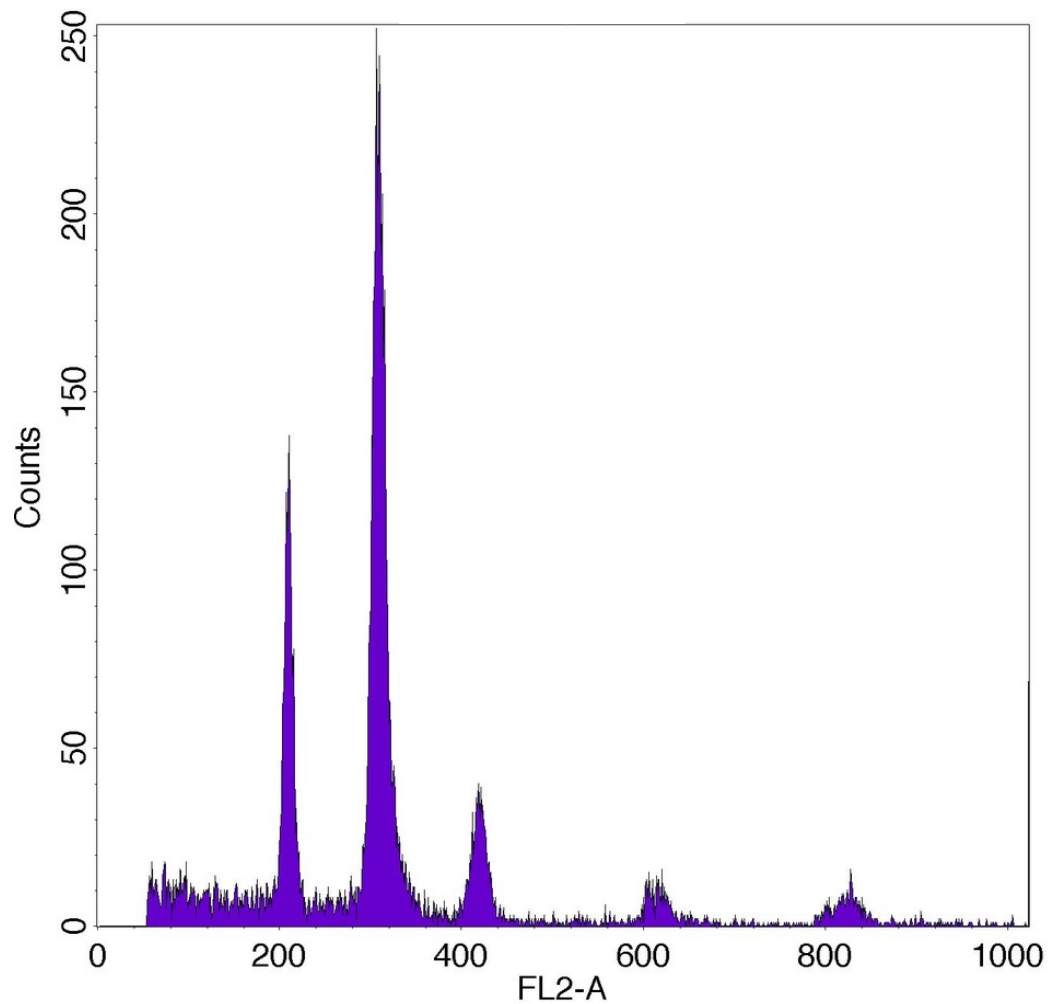

**Supplementary Figure 1. Determination of pokeweed genome size using flow cytometry.** A representative histogram is shown. The endopolyploid *Sorghum* has peaks at ~200 (2C), ~400 (4C), and ~800 (8C). Pokeweed has a 2C peak at ~300 and a small G2 peak at ~600 (<10% of total nuclei).
